# Supplementary material for: The adhesion and migration of microglia to β-amyloid (Aβ) is decreased with aging and inhibited by Nogo/NgR pathway
Source: PubMed Central journal article supplement (PMC6054753; doi:10.1186/s12974-018-1250-1), 2018-07-20

# Additional file 2: Figure S2

A

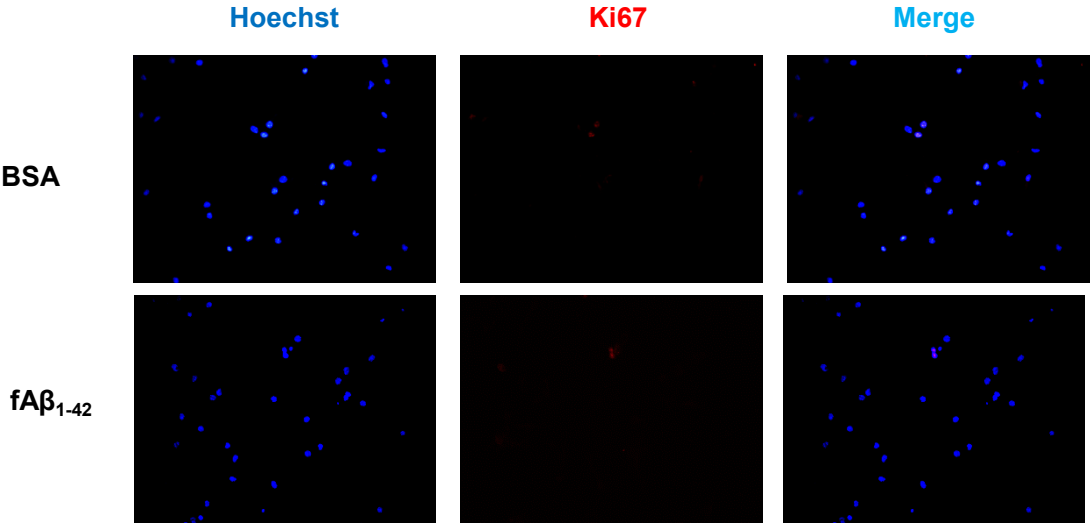

B

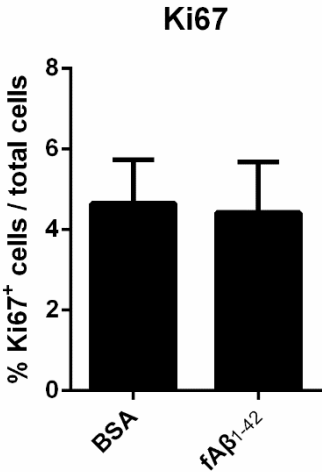

Supplement: 12974_2018_1250_MOESM2_ESM.pdf [file 12974_2018_1250_MOESM2_ESM.pdf]
